# Supplementary material for: Role of Mesh Pore Size in Dynamic Membrane Bioreactors
Source: MDPI journal article supplement (doi:10.3390/ijerph18041472), 2021-02-04
Supplement: s1 [file s1]

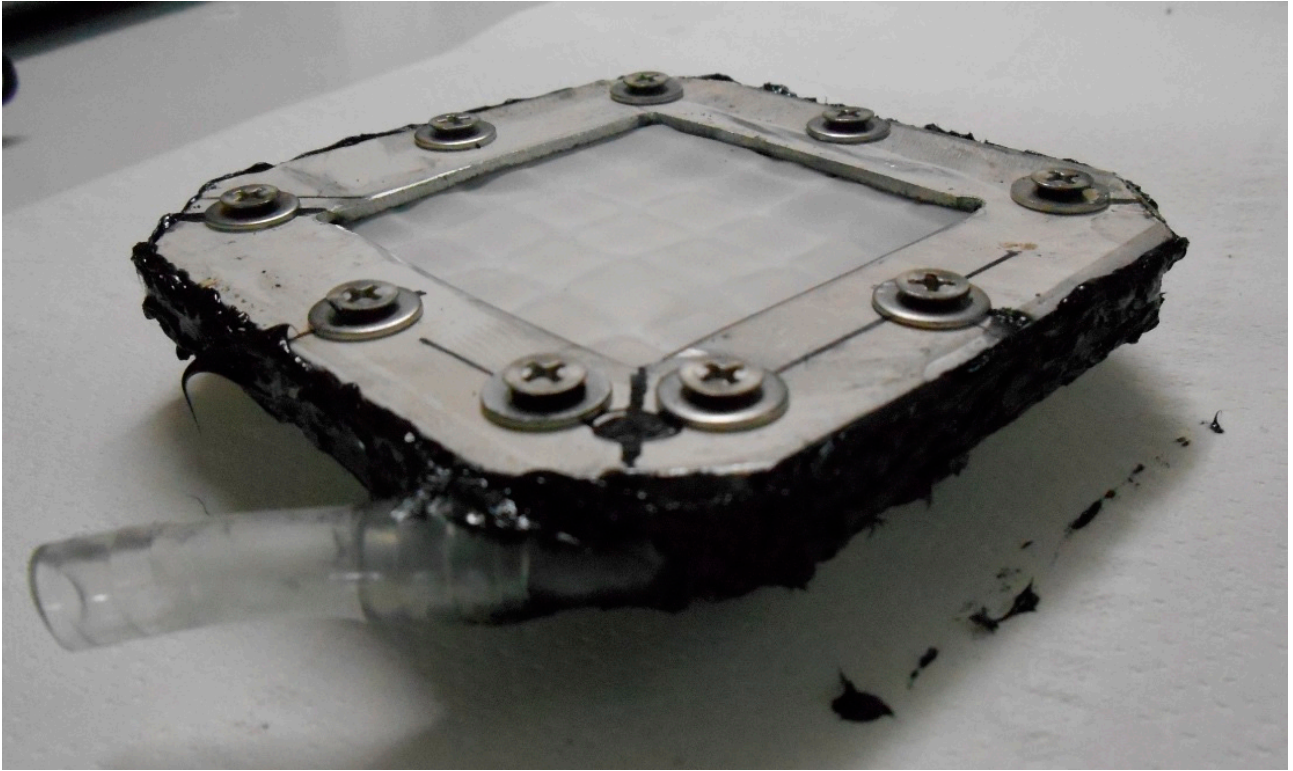

Figure S1. Flat sheet configuration of the nylon support in the SFD MBR module.

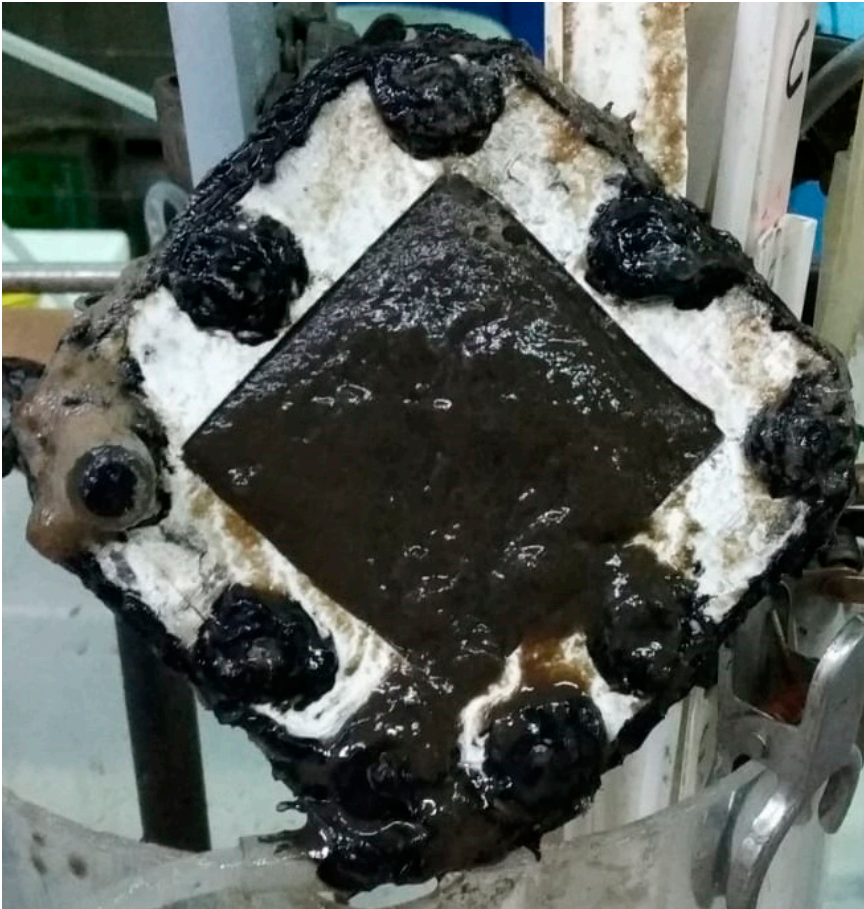

Figure S2. Mature dynamic membrane.

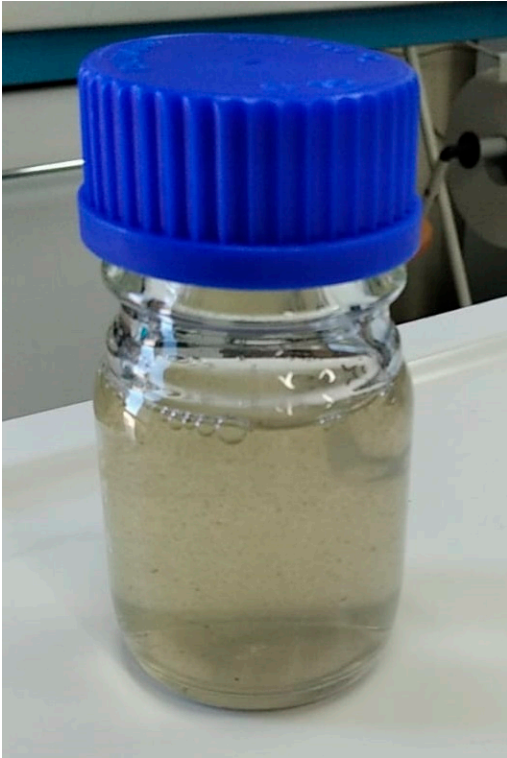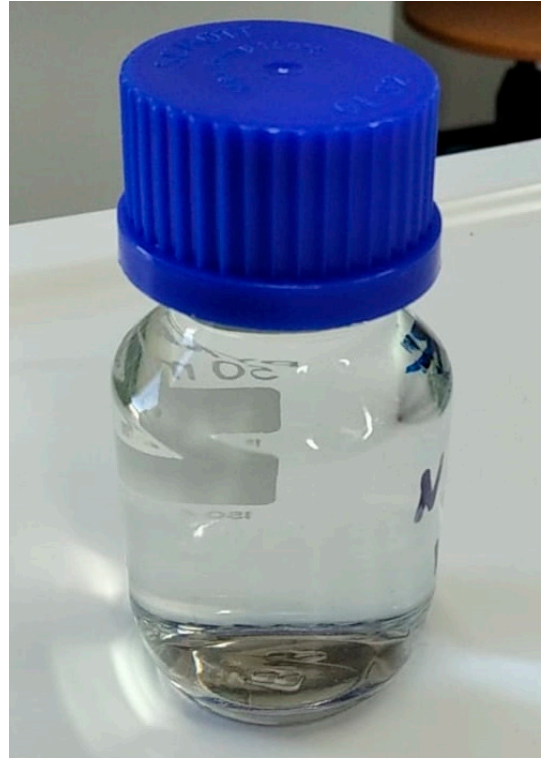

**Figure S3.** Samples of a) feed and b) permeate.

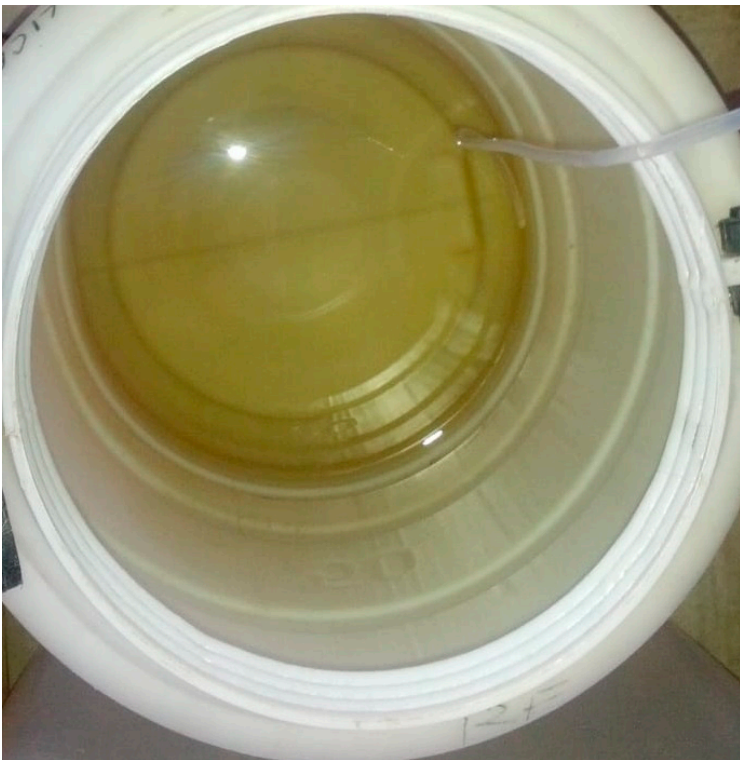

**Figure S4.** Permeate tank
